# Supplementary material for: O-GlcNAcylation of MORC2 at threonine 556 by OGT couples TGF-β signaling to breast cancer progression
Source: PubMed Central journal article supplement (PMC8991186; doi:10.1038/s41418-021-00901-0), 2022-01-01
Supplement: 41418_2021_901_MOESM1_ESM.pdf [file 41418_2021_901_MOESM1_ESM.pdf]

## **Supplementary Information for**

Liu et al. O-GlcNAcylation of MORC2 at threonine 556 by OGT couples TGF- $\beta$  signaling to breast cancer progression

### **The Supplementary Information includes**

1. Supplementary Figures S1-S9
2. Supplementary Figure legends
3. Supplementary Tables S1-S7

## Supplementary Figures and Figure legends

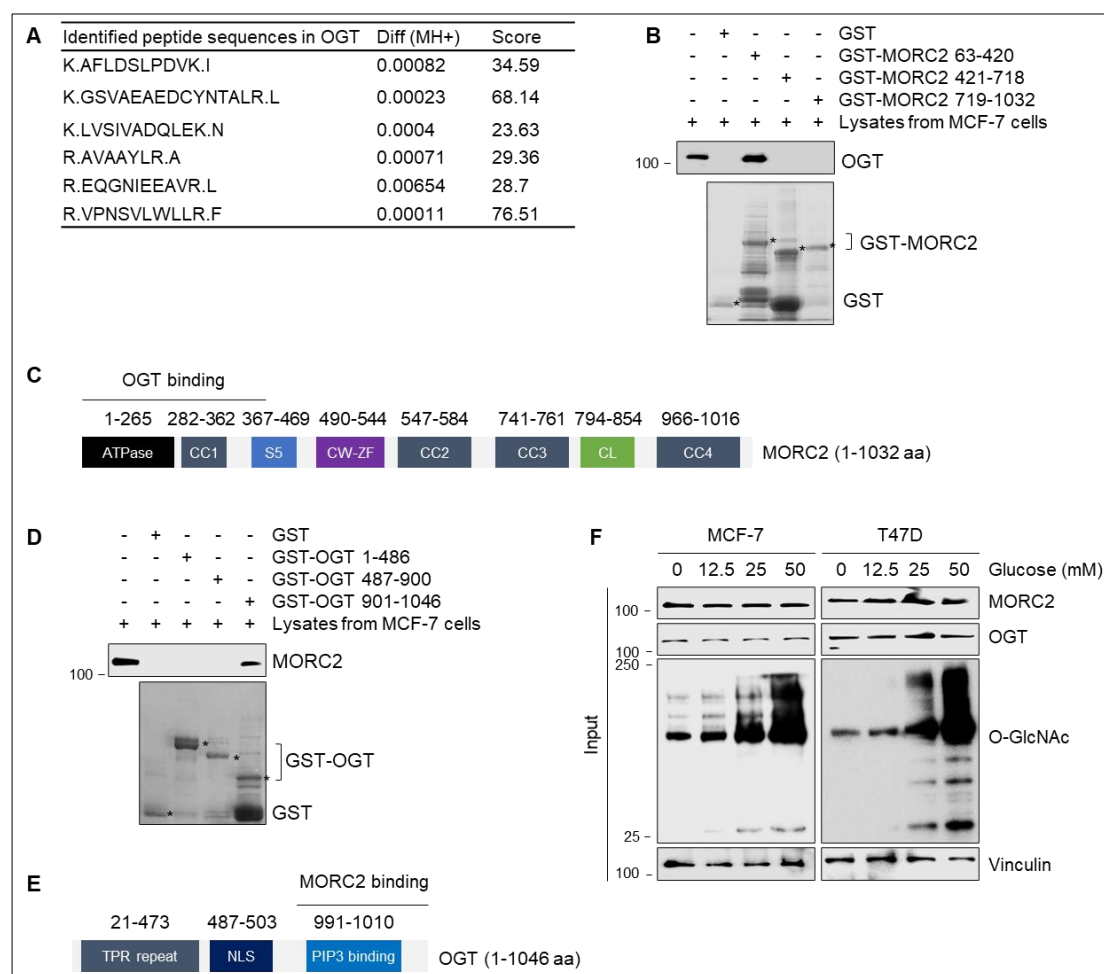

### Figure S1. OGT interacts with MORC2

(A) Identified peptide sequences in OGT by mass spectrometry. (B-C) GST or GST-MORC2 deletion fragments were incubated with lysates from MCF-7 cells. The pull-down protein complex was analyzed by immunoblotting with an anti-OGT antibody. GST or GST-MORC2 proteins were stained by Coomassie blue solution as loading controls (B). Schematic diagram showing the region of MORC2 for OGT binding (C). (D-E) GST or GST-OGT deletion fragments were incubated with lysates from MCF-7 cells. The pull-down protein complex was analyzed by immunoblotting with an anti-MORC2 antibody. GST or GST-OGT proteins were stained by Coomassie blue solution as loading controls (D). Schematic diagram showing the region of OGT for MORC2 binding (E). (F) MCF-7 and T47D cells were cultured in glucose- and serum-free medium for 24 h, and treated with increasing doses of glucose for 24 h. Immunoblotting analyses were performed with the indicated antibodies.

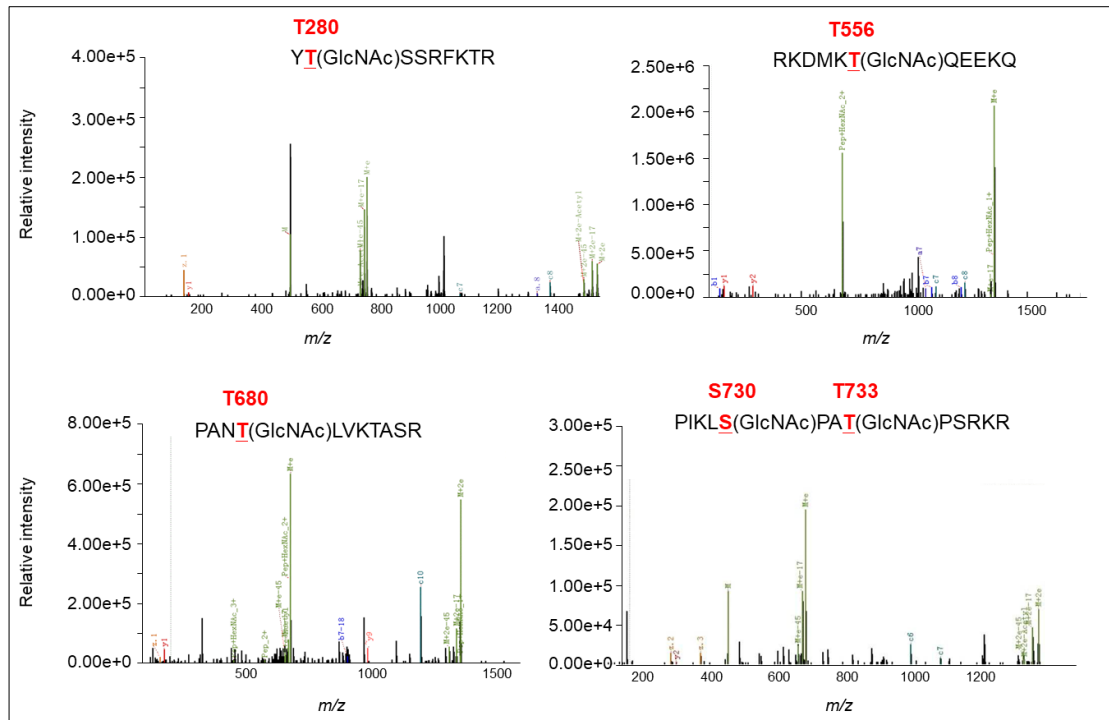

**Figure S2. Identification of MORC2 O-GlcNAcylation site(s) by electron transfer dissociation-mass spectrometry (ETD-MS)**

HEK293T cells were transiently transfected with Flag-MORC2 and HA-OGT. After 48 h of transfection, After IP using anti-Flag M2 beads and in-gel trypsin digestion, resultant peptides were subjected to electron transfer dissociation-mass spectrometry (ETD-MS) analysis. Identified potential O-GlcNAcylation sites in MORC2 are shown.

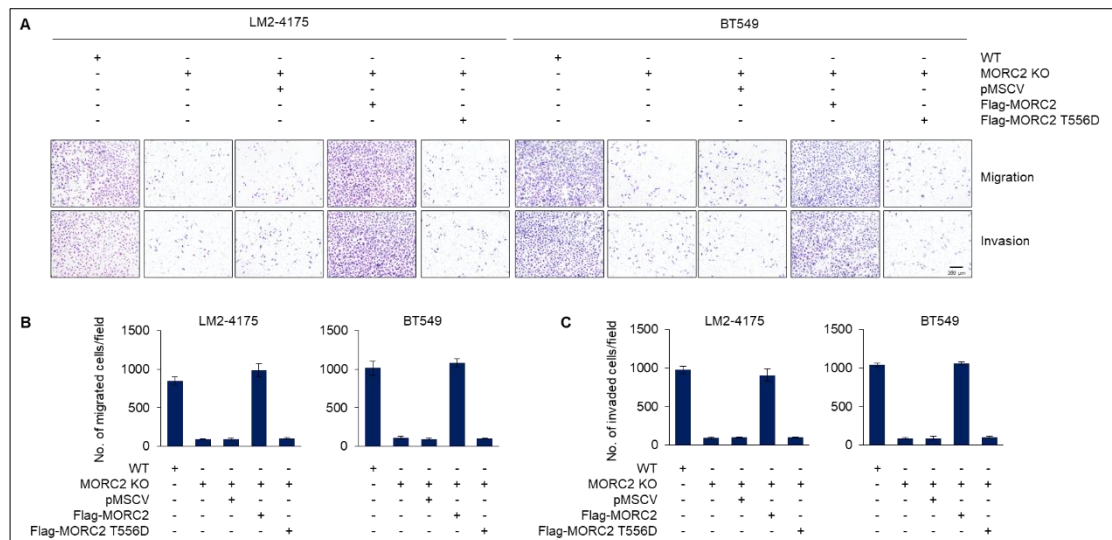

**Figure S3. The effects of potential T556 phosphorylation of MORC2 on T556 O-GlcNAcylation-mediated breast cancer cell migration and invasion**

T556 residue was replaced with aspartic acid (T556D) to mimic a constitutively phosphorylated MORC2 at T556. Then, endogenous MORC2 in LM2-4175 and BT549 cells were knocked out by CRISPR-Cas9 technology. Empty vector pMSCV or Flag-MORC2 (WT or T556D) were reintroduced into resultant MORC2-KO cells by lentiviral infection. Transwell migration and Matrigel invasion assays were carried out as described as in Materials and methods.



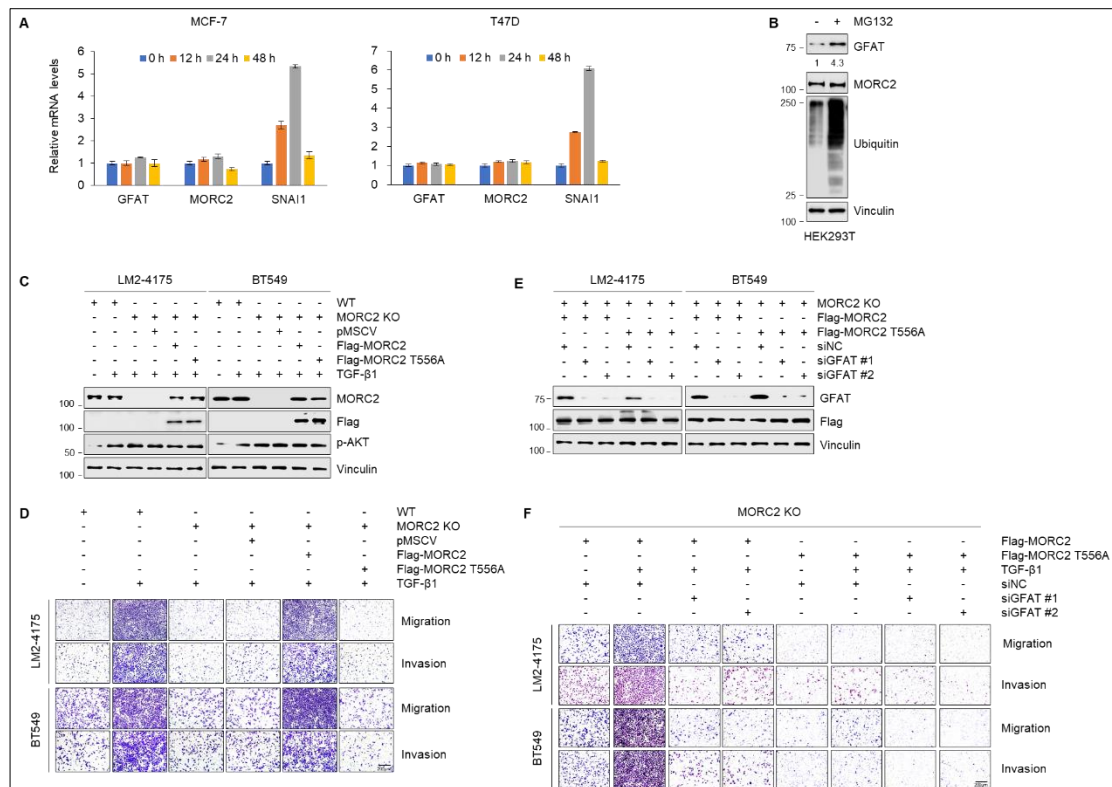

**Figure S5. TGF- $\beta$ 1 induces MORC2 O-GlcNAcylation at T556 through enhancing GFAT stability**

(A) MCF-7 and T47D cells were serum-starved for 24 h, treated with or without 5 ng/ml TGF- $\beta$ 1 for 24 h, and then subjected to qPCR analysis of *GFAT*, *MORC2*, and *SNAI1* mRNA levels.

(B) HEK293T cells were treated with or without 10  $\mu$ M MG-132 for 6 h and then subjected to immunoblotting analysis. GFAT levels were normalized to Vinculin levels. (C-D) WT and MORC2-KO LM2-4175 and BT549 cells stably expressing pMSCV, Flag-MORC2 or Flag-MORC2 T556A were serum-starved for 24 h, treated with or without 5 ng/ml TGF- $\beta$ 1 for 24 h, and then subjected to Transwell migration and invasion assays. Corresponding quantitative results are shown in Fig. 4O. Expression status of MORC2 in established stable cell lines was verified by immunoblotting analysis (C). Representative images of migrated and invaded cells are shown in D. (E-F) MORC2-KO LM2-4175 and BT549 cells stably expressing Flag-MORC2 or Flag-MORC2 T556A were transfected with siNC or two siRNAs targeting GFAT (siGFAT). After 24 h of transfection, cells were serum-starved for 24 h, followed by treatment with or without 5 ng/ml TGF- $\beta$ 1 for 24 h. Transwell migration and invasion assays were performed as described in Materials and Methods. Expression status of Flag-MORC2 and

GFAT in these cell lines was verified by immunoblotting analysis (E). Representative images of migrated and invaded cells are shown in F. Corresponding quantitative results are shown in Fig. 4P.

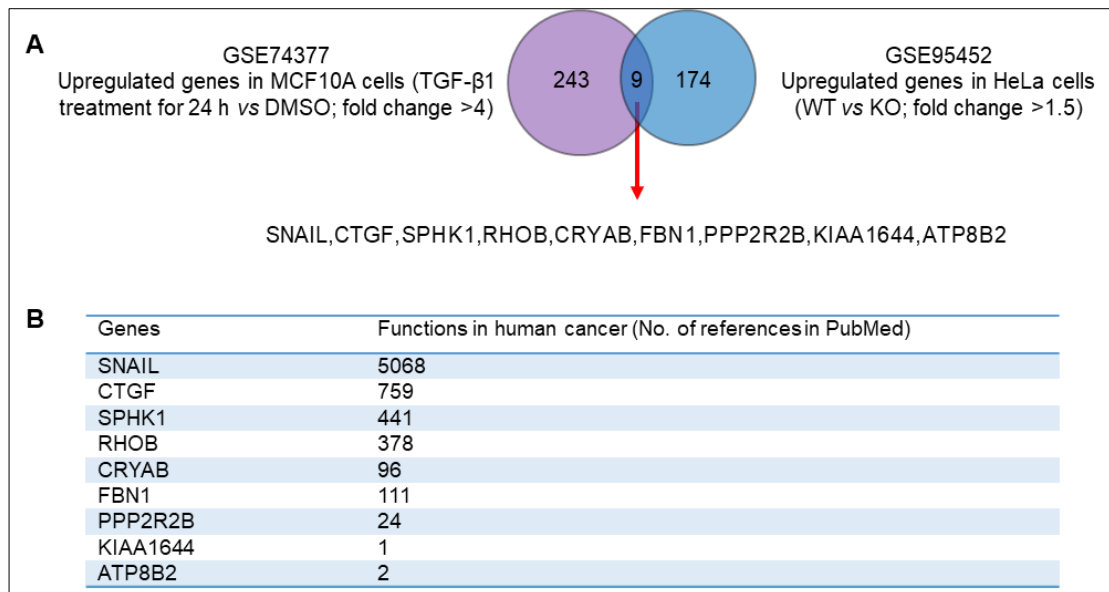

**Figure S6. Analysis of co-regulated genes by MORC2 and TGF- $\beta$ 1**

(A) Analysis of two publicly available RNA-Seq datasets, including GSE74377<sup>53</sup> and GSE95452<sup>19</sup>. According to the preset threshold, 9 commonly upregulated genes by TGF- $\beta$ 1 and MORC2 are indicated. (B) The documented functions of those 9 genes in human cancer.



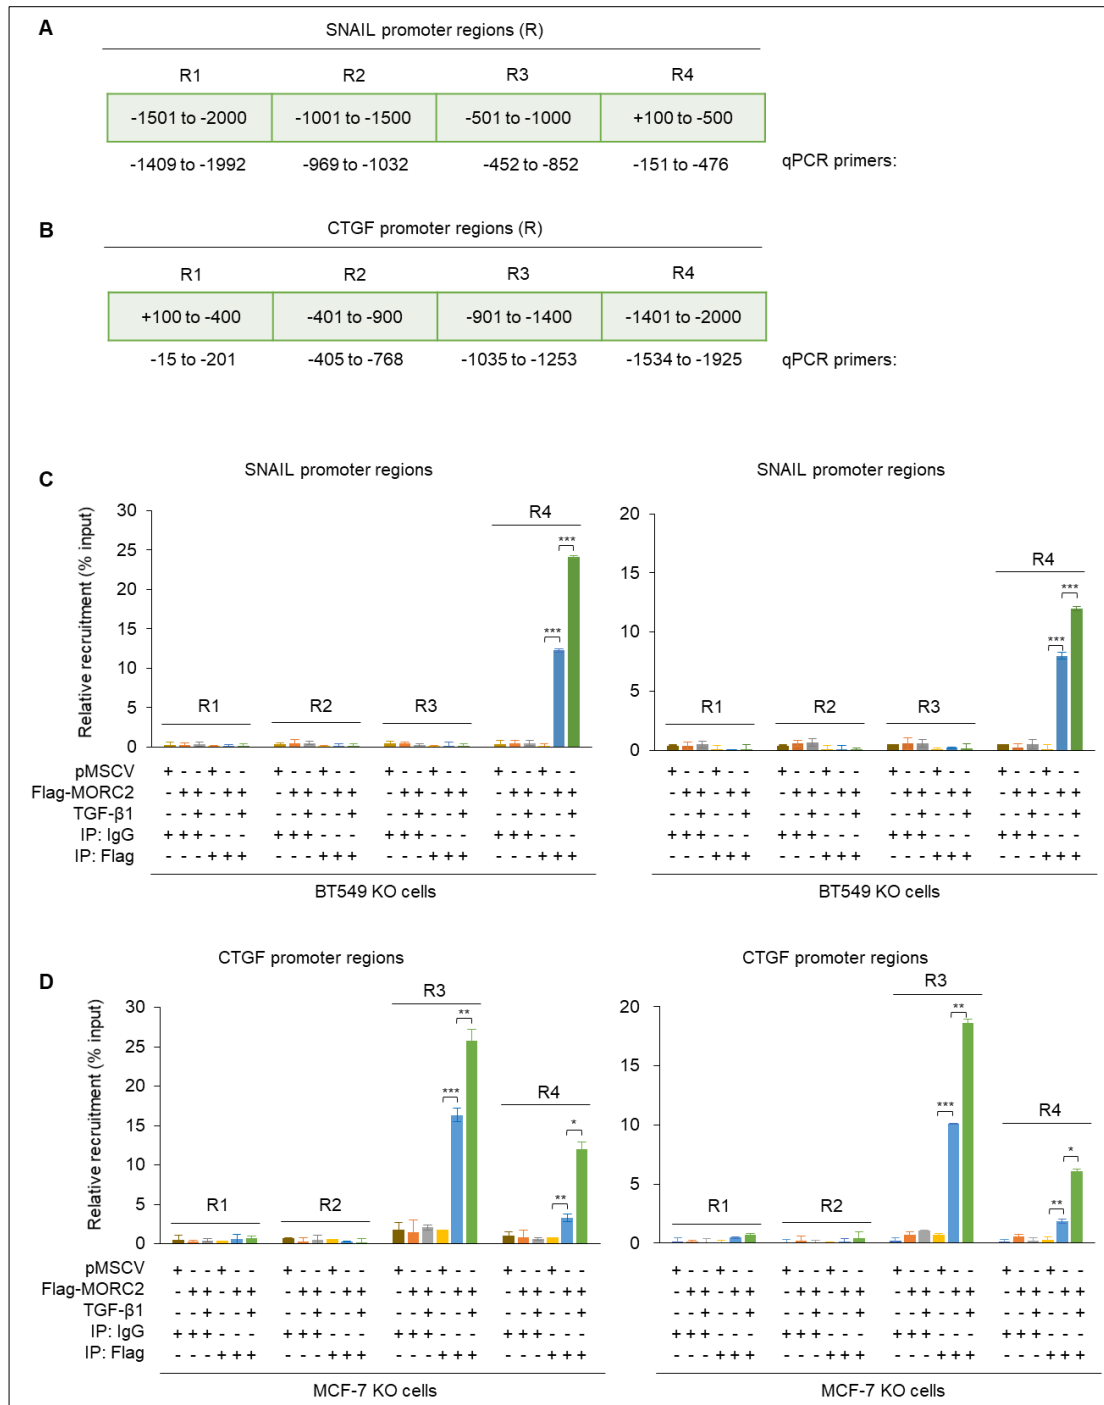

**Figure S7. O-GlcNAcylated MORC2 is recruited to the promoter of SNAIL and CTGF**

(A) The SNAIL promoter (+100 to -2000) was divided into four regions (R) (+100 to -500, -501 to -1000, -1001 to -1500, and -1501 to -2000). qPCR primers were designed against those four regions. (B) The CTGF promoter (+100 to -2000) was divided into four regions (R) (+100 to -400, -401 to -900, -901 to -1400, and -1401 to -2000). qPCR primers were designed against those four regions. (C) MORC2 KO MCF-7 and BT549 cells stably expressing pMSCV and

Flag-MORC2 were serum-starved for 24 h and then treated with or without 5 ng/ml TGF- $\beta$ 1 for 24 h. ChIP assays were performed with an anti-Flag antibody or IgG, followed by qPCR analysis. Recruitment of Flag-MORC2 to *SNAIL* promoter regions was normalized to the Input. \*,  $p < 0.05$ ; \*\*,  $p < 0.001$ ; \*\*\*,  $p < 0.001$ ; NS, no significance. (D) MORC2 KO MCF-7 and BT549 cells stably expressing pMSCV or Flag-MORC2 (WT or T556A) were serum-starved for 24 h, and then treated with or without 5 ng/ml TGF- $\beta$ 1 for 24 h. ChIP assays were performed with an anti-Flag antibody or IgG, followed by qPCR analysis. Recruitment of Flag-MORC2 to the *CTGF* promoter regions was normalized to Input. \*\*\*,  $p < 0.001$ ; NS, no significance.

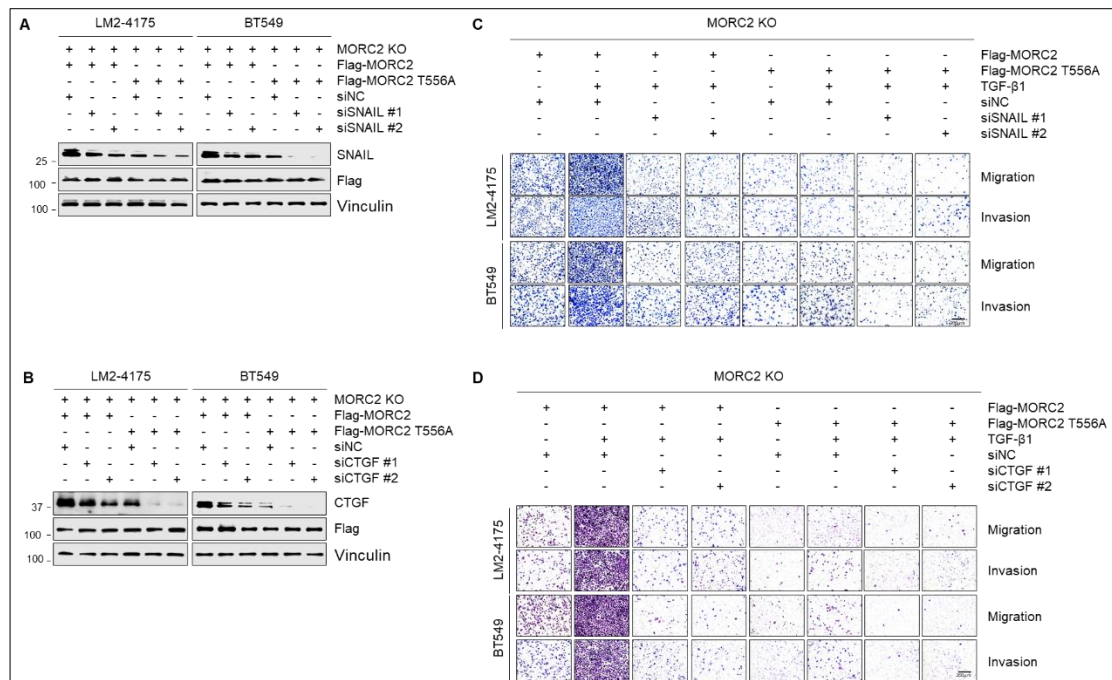

**Figure S8. Knockdown of GFAT, SNAIL or CTGF compromises TGF- $\beta$ 1-induced, MORC2 O-GlcNAcylation-mediated breast cancer cell migration and invasion**

(A) MORC2-KO LM2-4175 and BT549 cells stably re-expressing Flag-MORC2 or Flag-MORC2 T556A were transfected with negative control siRNA (siNC) or two siRNAs targeting SNAIL (siSNAIL). After 24 h of transfection, were serum-starved for 24 h, followed by treatment with or without 5 ng/ml TGF- $\beta$ 1 for 24 h. Immunoblotting analyses were performed with the indicated antibodies. (B) MORC2-KO LM2-4175 and BT549 cells stably re-expressing Flag-MORC2 or Flag-MORC2 T556A were transfected with negative control siRNA (siNC) or two siRNAs targeting CTGF (siCTGF). After 24 h of transfection, were serum-starved for 24 h, followed by treatment with or without 5 ng/ml TGF- $\beta$ 1 for 24 h. Immunoblotting analyses were performed with the indicated antibodies. (C-D) MORC2 KO LM2-4175 and BT549 cells stably expressing Flag-MORC2 or Flag-MORC2 T556A were transfected with siNC or two siRNAs targeting SNAIL (siSNAIL) (C) or siCTGF (D). After 24 h of transfection, cells were serum-starved for 24 h, followed by treatment with or without 5 ng/ml TGF- $\beta$ 1 for 24 h. Transwell migration and invasion assays were performed as described in Materials and Methods. Corresponding quantitative results are shown in 6I and 6J, respectively.

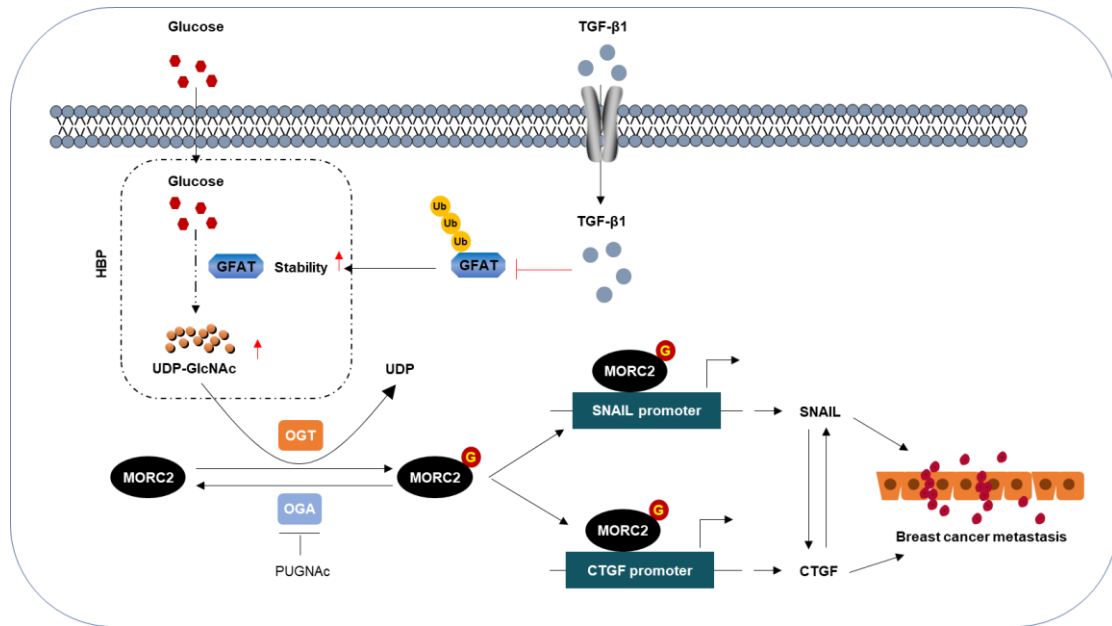

**Figure S9. The proposed working model.**

MORC2 is O-GlcNAcylated and de-O-GlcNAcylated at the conserved T556 by OGT and OGA, respectively. TGF-β1 enhances the stability of GFAT, the rate-limiting enzyme for producing the sugar donor for OGT, to induce MORC2 O-GlcNAcylation. O-GlcNAcylated MORC2 governs the expression of TGF-β1 target genes CTGF and SNAIL, which positively regulate each other, and contributes to breast cancer metastasis.

## Supplementary Tables

**Table S1. Characterization of clinicopathological features of 126 patients with primary breast cancer**

| Clinicopathological factors | No. |
|-----------------------------|-----|
| Age (yr)                    |     |
| ≤50                         | 64  |
| >50                         | 62  |
| Menopausal status           |     |
| Premenopausal               | 69  |
| Postmenopausal              | 57  |
| Grade                       |     |
| I                           | 4   |
| II                          | 52  |
| III                         | 59  |
| Unknown                     | 11  |
| Pathological T-stage        |     |
| T1                          | 66  |
| T2                          | 53  |
| T3                          | 4   |
| Tx                          | 3   |
| Pathological N-stage        |     |
| N0                          | 81  |
| N1                          | 28  |
| N2                          | 9   |
| N3                          | 8   |
| ER status                   |     |
| Positive                    | 70  |
| Negative                    | 56  |
| PR status                   |     |
| Positive                    | 58  |
| Negative                    | 68  |
| HER2 status                 |     |
| Positive                    | 47  |
| Negative                    | 79  |

*Notes: ER, estrogen receptor; PR, progesterone receptor; HER2, human epidermal growth factor receptor 2*

**Table S2. Chemical reagents used in this study**

| Chemical reagents              | Vendors | Cat#      | Working concentration |
|--------------------------------|---------|-----------|-----------------------|
| OSMI-1                         | Sigma   | SML1621   | 50 $\mu$ M            |
| PUGNAc                         | Sigma   | A7229     | 20 $\mu$ M            |
| SB431542                       | Selleck | S1067     | 5 $\mu$ M             |
| UDPNAC                         | Sigma   | U4375     | 2 mM                  |
| TGF- $\beta$ 1                 | CST     | 8915LF    | 5 ng/ml               |
| MG-132                         | Selleck | S2619     | 10 $\mu$ M            |
| Insulin                        | Yeasen  | 40107ES76 | 10 $\mu$ g/ml         |
| EGF                            | Sigma   | E9644     | 20 ng/ml              |
| Cycloheximide                  | CST     | 2112S     | 100 $\mu$ g/ml        |
| Hygromycin B                   | Sigma   | V900372   | 100 $\mu$ g/ml        |
| Protease inhibitor cocktail    | Bimake  | B14002    | 1 $\times$            |
| Phosphatase inhibitor cocktail | Bimake  | B15001    | 1 $\times$            |

**Table S3. Information for the expression vectors used in this study**

| Plasmids                | Sources              | Vectors               |
|-------------------------|----------------------|-----------------------|
| Myc-DDK-MORC2           | Origene (RC200518)   | pCMV6-Entry           |
| HA-MORC2-pCDH           | Subcloned            | pCDH-CMV-MCS-EF1-Puro |
| Flag-MORC2-WT           | Subcloned            | pMSCV-Hyg             |
| Flag-MORC2 T280A        | Subcloned            | pMSCV-Hyg             |
| Flag-MORC2 T556A        | Subcloned            | pMSCV-Hyg             |
| Flag-MORC2 T556D        | Subcloned            | pMSCV-Hyg             |
| Flag-MORC2 T680A        | Subcloned            | pMSCV-Hyg             |
| Flag-MORC2 S730A        | Subcloned            | pMSCV-Hyg             |
| Flag-MORC2 S733A        | Subcloned            | pMSCV-Hyg             |
| GST-MORC2 63-420        | Subcloned            | pGEX-6P-1             |
| GST-MORC2 421-718       | Subcloned            | pGEX-6P-1             |
| GST-MORC2 719-1032      | Subcloned            | pGEX-6P-1             |
| His-MORC2               | Subcloned            | pET28a (+)            |
| Flag-OGT                | Vigenebio (CH806183) | pEnter                |
| HA-OGT                  | Subcloned            | pCDH-CMV-MCS-EF1-Puro |
| HA-OGT H558A            | Subcloned            | pCDH-CMV-MCS-EF1-Puro |
| GST-OGT 1-486           | Subcloned            | pGEX-6P-1             |
| GST-OGT 487-900         | Subcloned            | pGEX-6P-1             |
| GST-OGT 901-1046        | Subcloned            | pGEX-6P-1             |
| pGL3-CTGF-promoter 3&4  | GENEWIZ Biotech      | pGL3-basic            |
| pGL3-SNAIL-promoter 4   | GENEWIZ Biotech      | pGL3-basic            |
| Flag-OGA                | Vigenebio (CH801095) | pEnter                |
| Lenti-Cas9-blast        | Addgene (52962)      | pFUGW                 |
| LentiGuide-Puro         | Addgene (52963)      | lentiGuide-Puro       |
| LentiGuide-Puro-MORC2#1 | Subcloned            | lentiGuide-Puro       |
| LentiGuide-Puro-MORC2#2 | Subcloned            | lentiGuide-Puro       |

**Table S4. Primers used for molecular cloning of expression vectors**

| Plasmids           | Primers | Sequences                                                                                |
|--------------------|---------|------------------------------------------------------------------------------------------|
| Flag-MORC2 WT      | Forward | AATACGGATCCGATGCTTTGCTTTTTGGA<br>TGAT                                                    |
|                    | Reverse | TATCCGCGGCCGCTATGGCCAAGACGTC<br>GACGCCTTTTAATCGTCGCATCCTTGTA<br>TCGTCCCCCTTGGTGTATGAGGTC |
| Flag-MORC2 T280A   | Forward | TACAAGCCCAGGATGTACAAGTACGCCTC<br>AAGCCGTTTC                                              |
|                    | Reverse | CGCACGGGTCTTGAAACGGCTTGAGGCGT<br>ACTTGTACAT                                              |
| Flag-MORC2 T556A   | Forward | GGAACATTCAGAAAGGACATGAAGGCC<br>AGGAAGAGAAG                                               |
|                    | Reverse | CAGTTGTTTCTGCTTCTCTCCTGGGCCT<br>CATGTCCTT                                                |
| Flag-MORC2 T556D   | Forward | GGAACATTCAGAAAGGACATGAAGGATC<br>AGGAAGAGAAG                                              |
|                    | Reverse | CAGTTGTTTCTGCTTCTCTCCTGATCCT<br>CATGTCCTT                                                |
| Flag-MORC2 T680A   | Forward | GAGGCACCCGAAAGCCTGCCAACGCCCT<br>CGTCAAGACT                                               |
|                    | Reverse | AGGTCGGGATGCAGTCTTGACGAGGGCGT<br>TGGCAGGCTT                                              |
| Flag-MORC2 S730A   | Forward | AAGACAGAGTCACCCATCAAACCTCGCCCC<br>GGCTACCCCT                                             |
|                    | Reverse | CCGCTTCCGACTAGGGGTAGCCGGGGCGA<br>GTTTGATGGG                                              |
| Flag-MORC2 S733A   | Forward | TCACCCATCAAACCTCTCCCCGGCTGCCCC<br>TAGTCGGAAG                                             |
|                    | Reverse | TGCGACACTCCGCTTCCGACTAGGGGCAG<br>CCGGGGAGAG                                              |
| HA-MORC2           | Forward | TTCTCGAGACTAGTTCT                   GCCACC<br>ATGGCTTTCACAAATTAC                         |
|                    | Reverse | GGATCCGCGGCCGCTCTTTAAGCGTAGTC<br>TGGGACGTCGTATGGGTAGTCCCCCTTGG<br>TGATGA                 |
| GST-MORC2 63-490   | Forward | CTGGGATCCCCGGAATTCATGCTTTG<br>CTTTTTGGATGATGGAG                                          |
|                    | Reverse | GCGGCCGCTCGAGTCGACTTAGACC<br>AGGTAGGGCACATCAACAAC                                        |
| GST-MORC2 491-718  | Forward | CTGGGATCCCCGGAATTCATGGTCCT<br>GGAGCCTACACACAACAACA                                       |
|                    | Reverse | GCGGCCGCTCGAGTCGACTTATGGA<br>GTCTTGATGACTTTGGGAGA                                        |
| GST-MORC2 719-1032 | Forward | CTGGGATCCCCGGAATTCATGGTGGT<br>GAAGAAGACAGAGTCACCC                                        |
|                    | Reverse | GCGGCCGCTCGAGTCGACTTAGTCC<br>CCCTTGGTGTATGAGGTC                                          |
| His-MORC2          | Forward | TTGCGGCCGCATGGCTTTCACAAATTACA<br>GC                                                      |
|                    | Reverse | GGAATTCTCAGTCCCCCTTGGTGATGAG                                                             |



|                  |         |                                                |
|------------------|---------|------------------------------------------------|
| HA-OGT           | Forward | AATAGCGGCCGCATGGCGTCTTCCGTGGG<br>CAAC          |
|                  | Reverse | TATTTTAGGATCCTGCTGACTCAGTGACTT<br>CAAC         |
| HA-OGT H568A     | Forward | GGATATGTGAGTTCCGACTTTGGGAATGC<br>CCCTACTTCTCAC |
|                  | Reverse | AATAGACTGCATAAGGTGAGAAGTAGGG<br>GCATTCCCAAAGTC |
| GST-OGT 1-486    | Forward | AATACTCGAGATGGTGCAGAAGGAGAGT<br>CAA            |
|                  | Reverse | TATTTTAGCGGCCGCCCTACTGCTGTATTG<br>ATGAG        |
| GST-OGT 487-900  | Forward | AATACTCGAGCAAGTTGCACACAGTGGA<br>GCT            |
|                  | Reverse | TATTTTAGCGGCCGCTGGCTGAAAAAAGA<br>GATCATT       |
| GST-OGT 901-1046 | Forward | AATACTCGAGCCTCCACTGACTCCTACCT<br>CC            |
|                  | Reverse | TATTTTAGCGGCCGCCAGGCTCCGACCAA<br>GTATAAC       |

---

**Table S5. Targeting sequences for siRNAs**

|           | Primers | Sequences              |
|-----------|---------|------------------------|
| siNC      | Forward | UUCUCCGAACGUGUCACGUTT  |
|           | Reverse | ACGUGACACGUUCGGAGAATT  |
| siOGT#1   | Forward | GUUGGCACAUCGAGAAUAUTT  |
|           | Reverse | AUAUUCUCGAUGUGCCAATT   |
| siOGT#2   | Forward | CCUGGCUUGUGUAUACUAUTT  |
|           | Reverse | AUAGUAUACACAAGCCAGGTT  |
| siOGA#1   | Forward | GCAGCAGACAAAGAGGUAUTT  |
|           | Reverse | AUACCUCUUUGUCUGCUGCTT  |
| siOGA#2   | Forward | GCUCUAAAGCUAGCAUUAATT  |
|           | Reverse | UUAAUGCUAGCUUUAGAGCTT  |
| siGFPT#1  | Forward | CCUGGAGACCCUAAUCAAAATT |
|           | Reverse | UUUGAUUAGGGUCUCCAGGTT  |
| siGFPT#2  | Forward | GGAGAGAGUUAUCCAACAATT  |
|           | Reverse | UUGUUGGAUAACUCUCUCCTT  |
| siCTGF#1  | Forward | GCACCAGCAUGAAGACAUATT  |
|           | Reverse | UAUGUCUUCAUGCUGGUGCTT  |
| siCTGF#2  | Forward | CCGACUGGAAGACACGUUUTT  |
|           | Reverse | AAACGUGUCUCCAGUCGGTT   |
| siSNAIL#1 | Forward | GCCUUCAACUGCAAUACUTT   |
|           | Reverse | AGUAUUUGCAGUUGAAGGCTT  |
| siSNAIL#2 | Forward | CCAAUGCUCAUCUGGGACUTT  |
|           | Reverse | AGUCCCAGAUGAGCAUUGGTT  |

**Table S6. Antibodies used in this study**

| Antibodies                                | Vendors      | Cat#       | Hosts  | Working concentration      |
|-------------------------------------------|--------------|------------|--------|----------------------------|
| OGT                                       | Abcam        | ab184198   | Mouse  | 1: 500 (IF)                |
| OGT                                       | Proteintech  | 11576      | Rabbit | 1:2000                     |
| MORC2                                     | Novus        | NBP1-89295 | Rabbit | 1: 500 (IF)                |
| MORC2                                     | Bethyl       | A300-149   | Rabbit | 1: 1000                    |
| OGA                                       | Abcam        | ab124807   | Rabbit | 1: 1500                    |
| O-GlcNAc                                  | ThermoFisher | MA1-072    | Mouse  | 1: 1000 (WB)<br>1:200 (IF) |
| His                                       | CST          | 12698      | Rabbit | 1: 1500                    |
| HA                                        | CST          | 3724       | Rabbit | 1: 1500                    |
| Flag                                      | Sigma        | F1804      | Mouse  | 1: 3000                    |
| Mouse IgG, HRP-linked                     | CST          | 7076       | Mouse  | 1: 1000                    |
| Rabbit IgG, HRP-linked                    | CST          | 7074       | Rabbit | 1: 1000                    |
| Mouse IgG<br>(Alexa Fluor 555 Conjugate)  | CST          | 4409       | Mouse  | 1: 500 (IF)                |
| Rabbit IgG<br>(Alexa Fluor 488 Conjugate) | CST          | 4412       | Rabbit | 1: 500 (IF)                |
| Mouse IgG<br>(Alexa Fluor 488 Conjugate)  | CST          | 4408       | Mouse  | 1: 500 (IF)                |
| Rabbit IgG<br>(Alexa Fluor 555 Conjugate) | CST          | 4413       | Rabbit | 1: 500 (IF)                |
| GST                                       | GNI          | GNI4110-GT | Mouse  | 1: 1000                    |
| CTGF                                      | Proteintech  | 23936-1-AP | Rabbit | 1: 500                     |
| GFAT                                      | Abcam        | ab125069   | Rabbit | 1: 500                     |
| SNAIL                                     | CST          | 3879S      | Rabbit | 1: 1000                    |
| Vinculin                                  | Sigma        | V9131      | Mouse  | 1: 3000                    |
| p-AKT S473                                | CST          | 4060T      | Rabbit | 1: 1000                    |
| Myc                                       | CST          | 2276S      | Mouse  | 1: 3000                    |
| MPP8                                      | Proteintech  | 16796-1-AP | Rabbit | 1: 1000                    |
| SETDB1                                    | Proteintech  | 11231-1-AP | Rabbit | 1: 1000                    |
| PPHLIN                                    | Abclonal     | A16295     | Rabbit | 1: 1000                    |
| TASOR                                     | Abclonal     | A13187     | Rabbit | 1: 1000                    |

**Table S7. Primers for qPCR analyses**

|                            | Primers | Sequences              |
|----------------------------|---------|------------------------|
| GFPT                       | Forward | GGAATAGCTCATACCCGTTGG  |
|                            | Reverse | TCGAAGTCATAGCCTTTGCTTT |
| MORC2                      | Forward | CCTATGCCGCTGTGCTCTAT   |
|                            | Reverse | TGCTTTCTTCACCTCCTGCT   |
| SNAIL                      | Forward | TCGGAAGCCTAACTACAGCGA  |
|                            | Reverse | AGATGAGCATTGGCAGCGAG   |
| CTGF                       | Forward | ACCGACTGGAAGACACGTTTG  |
|                            | Reverse | CCAGGTCAGCTTCGCAAGG    |
| GAPDH                      | Forward | CTGGGCTACTGAGCACC      |
|                            | Reverse | AAGTGGTCGTTGAGGGCAATG  |
| CTGF-promoter R1 (ChIP)    | Forward | AAAAAGTTGAGGGCCAAGTTGC |
|                            | Reverse | GAATGGCCAGCAAAGGGGTG   |
| CTGF-promoter R2 (ChIP)    | Forward | AGCCGATCTTTGCACCACA    |
|                            | Reverse | GGAGTGAGGTCAGGACAAGG   |
| CTGF-promoter R3 (ChIP)    | Forward | GAACCCCTTTGCATCCCAG    |
|                            | Reverse | GTGACTCAGGATGCAGTCTCC  |
| CTGF-promoter R4 (ChIP)    | Forward | TGGACAGAACAGGGCAAACCTT |
|                            | Reverse | CCTCATCAACTCACACCGGA   |
| CTGF-promoter R3&R4 (ChIP) | Forward | AGGTGAACCCCTTTGCATC    |
|                            | Reverse | CTCAGCGGGGAAGAGTTGTT   |
| SNAIL-promoter R1 (ChIP)   | Forward | ATGAAAGGAAGCCAGCGTGA   |
|                            | Reverse | CCGTCCCGTGTCAATTTAGC   |
| SNAIL-promoter R2 (ChIP)   | Forward | AGGACGATTTTGTTCACGGC   |
|                            | Reverse | GAGGAGGGACCTGGTTAGAGT  |
| SNAIL-promoter R3 (ChIP)   | Forward | GGAAGCTGCTCTCTAGGAGTT  |
|                            | Reverse | ATTATCAAGGGAAAAGGCCCGA |
| SNAIL-promoter R4 (ChIP)   | Forward | TGCGTTTCCCTCGTCAATGC   |
|                            | Reverse | GAGGAAAGAGCGCGGCATA    |
